# **Which food patches are worth exploring? Foraging desert birds do not follow environmental indicators of seed abundance at small scales: a field experiment**

5 Fernando A. Milesi <sup>1,2,\*</sup>, Javier Lopez de Casenave <sup>1</sup> & Víctor R. Cueto <sup>1,3</sup>

1 Desert Community Ecology Research Team (Ecodes), Departamento de Ecología, Genética y Evolución, Facultad de Cs. Exactas y Naturales, Universidad de Buenos Aires, and IEGEBA (UBA–CONICET), Buenos Aires, Argentina

10 2 Present address: Instituto de Investigaciones en Biodiversidad y Medio Ambiente, INIBIOMA (UNCo–CONICET), Centro de Ecología Aplicada del Neuquén (CEAN), Junín de los Andes, Neuquén, Argentina

3 Present address: Centro de Investigación Esquel de Montaña y Estepa Patagónica, CIEMEP (UNPSJB–CONICET), Esquel, Chubut, Argentina

15 \* Corresponding author:

Dr. Fernando A. Milesi

INIBIOMA (UNCo-CONICET)

CEAN, Ruta 61, Km. 3

8371 Junín de los Andes, Neuquén, Argentina

20 email: [fmilesi@conicet.gov.ar](mailto:fmilesi@conicet.gov.ar)

*ORCID: 0000-0002-7281-1131*

*Short title: Foraging by granivorous desert birds*

## ABSTRACT

25 Consumers should show strong spatial preferences when foraging in environments where  
food availability is highly heterogeneous and predictable from its correlation with informative  
environmental features. This is the case for postdispersal granivores in most arid areas, where  
soil seed bank abundance and composition associates persistently with vegetation structure at  
small scales (e.g., decimeters to meters). We analysed seasonal single-seed removal by  
30 granivorous birds from 300 experimental devices in the algarrobal of the central Monte desert.  
Spatial selectivity was analysed by comparing the structural characteristics of used vs. available  
microhabitats and evaluated against bottom-up and top-down hypotheses based on our previous  
knowledge on local seed bank abundance, composition and dynamics. Seed removal, which  
showed its expected seasonal variability, was also explored for spatial autocorrelation and  
35 environmental dependencies at bigger scales. Postdispersal granivorous birds were less selective  
in their use of foraging space than expected if patch appearance were providing them useful  
information to guide their search for profitable foraging patches. No kind of microhabitat, as  
defined by their vegetation and soil structure, was safe from bird exploration. The only consistent  
selective pattern at this scale was closer to a top-down spatial effect by birds, i.e., a cause (and  
40 not a consequence) of the seed bank dynamics. Bigger spatial scales proved more relevant to  
describe heterogeneity in the use of foraging patches in this habitat. Closeness to tall trees,  
probably related to bird territoriality and reproduction or to their perception of predation risk,  
seems to determine a first level of selection that defines explorable space, and then microhabitat  
openness exerts an influence on which patches are effectively exploited (or more frequently  
45 explored) among those accessible.

## INTRODUCTION

The decision-making process of foraging animals involves gathering information on critical factors, either by inference from reliable environmental cues or by local assessment after a site has been explored (Mitchell 1989, Valone 1991, Stephens 2007). Food availability, together with  
50 costs and benefits related to foraging efficiency, vulnerability to predators and microclimate are usual candidate factors affecting selection of foraging patches by small individual animals (Wiens 1985, Repasky and Schluter 1994, Meyer and Valone 1999). The ability to assess and respond to patchiness at small scales allows foragers to exploit their habitat more efficiently, particularly if there are physical cues associated with patch boundaries that can be perceived  
55 through direct sensory input (Bell 1990, Schmidt & Brown 1996, Fierer & Kotler 2000). Consumers should show strong spatial preferences when foraging in environments where food availability is highly heterogeneous and predictable from its correlation with informative environmental features. This would allow them to behave as “prescient foragers”, releasing them from the costs of random or indiscriminate exploration (paying ‘the penalty of ignorance’) or  
60 continuously gathering spatial data to update their knowledge on distribution and location of food patches (Valone 1991, Kohlmann and Risenhoover 1998, Dall et al. 2005, Olsson & Brown 2006, Eliassen et al. 2007, Olsson & Molokwu 2007, Sih 2011, Marshall et al. 2013).

Postdispersal seed predation, as other foraging situations, can be split in two components: (1) patch exploration, stated as the probability of at least one seed being removed from a patch, and  
65 (2) patch exploitation, the amount or proportion of seeds removed once the patch was explored (‘seed encounter’ and ‘seed exploitation’ *sensu* Hulme 1994). Seed availability in the soil of most deserts is highly heterogeneous at small scales (e.g., decimeters to meters) and associates persistently with vegetation structure (e.g., Nelson & Chew 1977, Price and Reichman 1987,

Guo et al. 1998, Caballero et al. 2008), and the central Monte Desert (Argentina) is no exception:  
70 seeds and litter consistently accumulate under shrub and tree canopies (Marone & Horno 1997,  
Marone et al. 2004, Milesi & Marone 2015, Andrade 2016). Woody cover (and litter) provides  
conspicuous environmental cues of resource abundance that should allow visual foragers such as  
birds to increase their foraging success by exploiting this “pre-harvest” or “prior” information  
accumulating their previous experiences and evolutionary history (Valone 1991, Dall et al. 2005,  
75 Marshall et al. 2013). As predicted by classic ‘attack’ foraging models like the ‘optimal patch  
choice’ and ‘diet’ models (Pyke 1984, Stephens and Krebs 1986, Ydenberg et al. 2007),  
postdispersal granivorous birds should follow patch appearance and neglect “poor patches”  
before going through the cost of their exploration. However, the expected association between  
vegetation cover and postdispersal seed consumption was not evident at this spatial scale when  
80 tested by following foraging granivorous birds at field: no differences in vegetation  
characteristics were found between foraging microsites and randomly-chosen microsites (Milesi  
et al. 2008).

Foraging decisions informed by environmental cues of resource abundance may have further  
ecological consequences (Schmidt et al. 2010) if selective consumption influences the spatial  
85 distribution of resources (i.e., a top-down spatial effect). Non-random seed removal affects the  
composition and heterogeneity of the seed bank, so spatial patterns of seed abundance on the  
ground and, later, of adult plants may be interpreted also as the consequence —instead of the  
cause— of consumption by granivores (Hulme 1997, Russell and Schupp 1998, Guo et al. 1995,  
Howe & Brown 2001, García et al. 2005, Orrock et al. 2006, Maron et al. 2012). Granivorous  
90 birds should be able to modify abundance, composition and spatio-temporal heterogeneity of the  
soil seed bank in arid areas where they are important granivores (e.g., at the Monte desert:  
Marone et al. 1998b, 2008), especially because their diet is usually selective (e.g., Willson 1971,

Pulliam 1985, Cueto et al. 2006, Camin et al. 2015). However, most studies on the impact of granivores on desert seed banks have emphasised the impact of rodents and ants (e.g., Nelson & Chew 1977, Reichman 1979, MacMahon et al. 2000, Anderson & MacMahon 2001), mostly as a derivation of the presumed “irrelevance” of birds on deserts of the Northern Hemisphere (Mares & Rosenzweig 1978, Abramsky 1983, Parmenter et al. 1984; but see Thompson et al. 1991, Guo et al. 1995, Lopez de Casenave et al. 1998, Marone et al. 2000b).

We evaluated spatial selectivity at small scales by foraging postdispersal granivorous birds in open woodlands (*algarrobales*) of the central Monte desert. Every season, we analysed the spatial pattern of seed removal from experimental devices and compared the structural characteristics of the vegetation in used microhabitats against those available. Most studies on seed removal emphasize the exploitation component of seed predation through explicit or implicit baiting (e.g., proper baiting, training sessions, ad-libitum patches) to minimize the probability that focal organisms do not detect or disregard the experimental setup. Instead, we offered a single seed per device aiming to detect where do birds normally search for seeds, and not where or how much they are able to remove when an extraordinary rich patch is suddenly available (the “magic pudding effect”: Bedoya-Pérez et al. 2013). Though not frequently, some studies have used, distinguished or compared both approaches (e.g., Thompson et al. 1991, Manson & Stiles 1998, Kelt et al. 2004). According to our previous knowledge on local seed-bank dynamics, (Marone & Horno 1997, Marone et al. 2004, Milesi 2006) the bottom-up hypothesis predicts that birds should remove experimental seeds preferentially from devices under shrubs and trees or under grass cover (i.e., where seeds concentrate). The top-down interpretation of differences between potential and effective seed banks (Marone et al. 1998a, 1998b, 2000a) calls instead for granivorous birds that use open, bare-soil microhabitats disproportionately, at least during autumn and winter, to account for the observed postdispersal

reduction in the density of their preferred seeds in open microsites. Use of space at small scales may not only vary with time but depend on context at bigger spatial scales, a key knowledge for proper interpretation of selective patterns (Kotliar & Wiens 1990, Jones 2001, Mayor et al. 2009). Seed removal from our experimental devices was explored for spatial patterns and environmental dependencies, particularly because we had previous observational evidence on the relevance of tall trees on granivorous birds foraging in this habitat (Milesi et al. 2008).

## METHODS

### *Study area*

The study was done in the Biosphere Reserve of Ñacuñán (34°03'S, 67°54.5'W), in the central Monte desert, Province of Mendoza, Argentina. The climate is dry, with wide variations in annual precipitation between years (mean: 348.9 mm, range: 192.6–585.4 mm, 1972–2002). It is also highly seasonal, with warm and rainy summers (>20 °C, 269 mm) and cold and dry winters (< 10 °C, 80 mm). A complete description of the area can be found in Lopez de Casenave (2001).

The main habitat of the Reserve is the *algarrobal*, an open woodland of algarrobo (*Prosopis flexuosa*) trees 3–6 m high scattered in a matrix of perennial *Larrea divaricata* tall shrubs (1–3 m high, horizontal cover >35%). Other woody species are *Geoffroea decorticans* trees, tall shrubs such as *Capparis atamisquea*, *Condalia microphylla* and *Atriplex lampa* (usually >1 m high), and low shrubs (~20% cover, usually <1 m high) such as *Lycium* spp., *Verbena aspera* and *Acantholippia seriphioides*. There is also an important cover (>25%) of perennial grasses (*Pappophorum* spp., *Trichloris crinita*, *Digitaria californica*, *Aristida* spp., *Setaria* spp., *Sporobolus cryptandrus*). Most of the reserve has been closed to cattle ranching and other

140 significant human activities since 1971. About a third of the surface of the algarrobal lacks perennial vegetation in the form of open patches of variable size (from centimeters to meters). Forb cover is highly variable among seasons and years, usually an order of magnitude lower than grass cover; therefore they were not considered in the description of the vegetation structure, following local studies of the seed bank (Marone & Horno 1997, Marone et al. 2004) and bird foraging (Milesi et al. 2008).

145 Seeds of herbaceous plants are the staple diet of granivorous birds (75–99% of their granivorous diet is grasses and one forb species; Marone et al. 2008). Their abundance in the soil is very heterogeneous at small scales, with close patches of extreme abundances. Seeds are consistently more abundant under trees and shrubs and in depressions of the soil where litter accumulates, mostly because of the persistent seed bank of forb seeds (Marone et al. 2004, 150 Andrade 2016). The abundance of grass seeds, preferred by these birds (Cueto et al. 2006, Camin et al. 2015), is less heterogeneous though still higher under woody cover, with some intra- and inter-annual variability. Forbs start producing seeds in the spring and grasses usually in summer. Primary seed dispersal starts in late spring and finishes by winter; maximum seed availability in the soil occurs during autumn and winter, with a minimum when summer begins (Marone et al. 155 1998a, 2004).

#### *Experimental offer of single seeds*

Single seeds were offered on top of each of 300 devices, made of upside-down feet of plastic flute glasses with their stems buried so the top (originally the base of the glass) remained 2–3 cm over the ground. This configuration prevented access by granivorous ants and other arthropods 160 that cannot walk upside-down on the smooth plastic surface (Kelrick et al. 1986, Lopez de Casenave et al. 1998, *pers. obs.*). Devices were arranged 5-m apart on three 10×10 grids (‘J’, ‘F’

and ‘V’; area  $\approx 2000 \text{ m}^2$  each) located 80–400 m apart within the algarrobal. A single *Setaria italica* seed (a commercial species bigger than the otherwise similar local *Setaria leucopila*, both readily consumed by birds; Cueto et al. 2006) was offered on each device for two consecutive  
165 days from sunrise to sunset (standardised following the civil twilight data and criteria by U.S. Naval Observatory; U.S. Navy n.d.), once per season (i.e.,  $\sim 23.3$  h in Autumn to  $\sim 29.5$  h in Summer). The top surface of the device, 6 cm in diameter, was covered with local soil for a similar visual appearance to the surrounding ground. According to estimations from simultaneous soil samples (L. Marone, unpublished), our experimental seed offer should not  
170 result particularly attractive against background seed offer: from 2.4 (bare soil in spring) to 19.3 (beneath shrubs in winter) grass seeds are expected in a similar sized area of soil. The experimental single seed on the device surface had a similar biomass density to the expected average for grass seeds in this habitat during winter ( $\sim 0.1 \text{ mg/cm}^2$ ) and 36% of the biomass of all consumable seeds (those in the diet of granivorous birds, Marone et al. 2008).

175 Rodents that may have remove seeds in the area are mainly nocturnal (Lopez de Casenave et al. 1998). Two additional trials were done under a modified protocol to test the assumption that birds were the (only) diurnal organisms removing seeds from these devices. Clayish local soil was smoothed around 50 devices in grid F before offering seeds during an extra day after the main summer and winter trials. Footprints of birds, mammals and other taxa (insects and lizards)  
180 were easily recognised on the smooth fine soil. In most cases where the seed has been removed only bird footprints were detected, in both winter ( $32/35 = 91\%$ ) and summer ( $7/9 = 78\%$ ) trials. The rest had mixed footprints of birds and other taxa or not recognisable footprints, but no device without seed had footprints of other taxa exclusively. On the other side, no bird footprints were found around devices where the seed had remain, suggesting that the seed was usually  
185 removed when closely approached by walking birds.



Seed removal from these devices can be assigned to small seed-eating birds of the ground foragers guild, particularly *Zonotrichia capensis*, *Saltatricula multicolor*, *Diuca diuca*, *Poospiza ornata* (in summer) and *Phrygilus carbonarius* (Marone 1992, Lopez de Casenave et al. 2008, Milesi et al. 2008). Other birds in Ñacuñán do not forage for seeds on the ground or are rare or occasional visitors to this habitat (Lopez de Casenave 2001; e.g., *Poospiza torquata*, *Catamenia analis*, *Zenaida auriculata*, *Columba maculosa*, *Columbina picui*, *Carduelis magellanica*, *Molothrus bonariensis*, *Passer domesticus*, *Eudromia elegans*, *Nothura darwinii*). The expectation for these other species to prefer microhabitats with more seeds is still valid, so any occasional bird removing seeds from the devices should not alter our main conclusions.

Since seed removal from a device was not independent between the two consecutive days in any of the four seasons (Fisher exact tests for 2×2 contingency tables:  $\chi^2 > 14.15$ ,  $P < 0.001$ ,  $n = 300$ , with more observations of “double removal” and “never removed” than expected by chance), a device was defined as “used” in each season if the seed was removed at least once during the two days it was offered. Independence of seed removal among seasons was tested for each grid by comparing the distribution of observed frequencies of the number of season in which each device was used (0–4) against the expected frequencies calculated as the product of four Bernoulli trials with  $n = 100$  (each seasonal experiment) with variable probabilities of success, estimated as the proportion of used devices in that grid for each season. Goodness of fit was evaluated with a  $\chi^2$  statistic.

Temporal and spatial heterogeneity in intensity of seed removal (proportion of used devices per grid) was tested with binomial generalised linear models (*logit* link) with GRID and SEASON as independent categorical variables. Significance of predictors was assessed comparing the change in deviance of nested models obtained through stepwise backwards elimination,

asymptotically distributed as  $\chi^2$ . The ratio of deviance to degrees of freedom in the minimum  
210 adequate model was 1.74, but corrections for overdispersion did not change interpretation of  
results ( $F$ - vs.  $\chi^2$ -tests).

#### *Vegetation and soil characteristics at the microhabitat scale*

Studies on use of space through short-term observations rely on asymmetric evidence:  
while patch use can be inferred from seed removal, non-removal does not imply the patch is not  
215 to be explored eventually. This lack of a proper “no use” group should raise concerns on simple  
statistical analyses based on a priori classification into exclusive groups (e.g., discriminant  
analyses), particularly if they assume similar variability in both (homocedasticity), or based on  
assigning zero probability of use (e.g., classical logistic regression). Identification of explanatory  
variables and predictive value of the statistical models can both suffer from the unrecognized  
220 probability of false-negatives (Tyre et al. 2003, Martin et al. 2005, Elith et al. 2006). Though  
more complex modelling strategies can incorporate or simulate incomplete evidence on absences  
in a spatially explicit context (e.g., species distribution and Bayesian models; see Hirzel et al.  
2002, Elith et al. 2006, Latimer et al. 2006), we preferred an indirect strategy to evaluate  
selection that best matches how we developed our set of hypotheses and predictions. We started  
225 by detecting and simplifying the main structural and floristic characteristics defining the  
heterogeneity of this habitat at the microsite scale, which we assumed in previous studies (e.g.,  
Marone et al. 2004, 2008, Milesi et al. 2008) to depend mainly on shrub and tree cover and relate  
with main characteristics of the seed bank. Then, we evaluated if used microsites (i.e., those  
where the seed had been removed) were a random (no selection) or a skewed (selective) sample  
230 of available microsites, both on their characteristics and on their spatial position.

Characteristics of the vegetation and soil cover in the microhabitat around each device position were measured by placing a vertical 1-m long pole (2 cm diameter) every 10 cm along four 50-cm transects (=20 points per microsite) from the device to each cardinal direction. At each point, perennial plants (trees, shrubs and grasses) touching the pole were identified to genus level. The presence of vegetation >1 m and the presence of dense litter (when it prevented from seeing the mineral soil below) or its absence (bare soil) were also recorded. Percentage cover per plant group (grasses, standing dry grasses, low shrubs, tall shrubs, and trees) and of bare soil and deep litter were calculated after those measurements.

A Principal Components Analysis (PCA) with Varimax rotation of the selected axes was done to reduce the number of dimensions of the ten variables measured at the microsite scale. Some variables were previously transformed (arcsin, square root or logarithm) to improve the symmetry of their distributions and then standardised into the PCA correlation matrix. Alternative analyses at the level of plant genus gave noisier but similar results on the main axes. Three components (PC1–PC3) were retained following the Kaiser criterion (eigenvalue >1), the broken-stick model, and the scree-plot (Jackson 1993). Before multidimensional analyses, scores on each axis were multiplied by its eigenvalue to weight them according to the variability they represent (see Peres-Neto & Jackson 2001); though applied for correctness, these variable transformations and weights did not change results significantly. Separate PCA analyses for each grid resulted in similar principal components and scores correlated with those of the grouped analysis (Pearson correlation, all cases  $n = 100$ ,  $r > 0.8$ ,  $P < 0.001$ , except for PC3 in grid V:  $r = 0.21$ ,  $P = 0.03$ ) confirming that heterogeneity of main characteristics at this scale were similar for the three sites. Therefore, only PCA scores based on all microhabitats were used for subsequent analyses. Scores based on microhabitat characteristics were compared among grids with Kruskal-Wallis tests.

255 The microhabitat around each device was also categorized at field *a priori* following the same  
criteria used on previous studies (Marone & Horno 1997, Marone et al. 2004): beneath trees,  
beneath tall shrubs, beneath low shrubs, beneath grasses (under no woody cover), and bare soil  
(no perennial cover). Characteristics of the vegetation around 79 grid points (26%) did not fit  
neatly into any of those categories (e.g., shrub borders); they were assigned to an “intermediate”  
260 category.

Big trees (trees >3 m and algarrobos >4 m high) in and around the grids were mapped,  
measuring the distance between each device and the nearest tree canopy. Other minimum  
distances to vegetation in several height strata and to closest canopy of each plant group were  
measured but resulted highly correlated with measurements of horizontal cover (since most  
265 distances were smaller than a microsite radius, e.g., 96% of distances to nearest grass or 78% to  
vegetation 1–2 m high, see Milesi 2006). Therefore, only distances to tall trees were informative  
in addition to the measured characteristics at the microhabitat scale. Distances were compared  
among grids with Kruskal-Wallis tests.

#### *Foraging site selection based on microhabitat characteristics*

270 Selection at the microhabitat scale was evaluated (1) multidimensionally, with a spatial  
technique applied to results of the PCA ordination and (2) unidimensionally, with a  
randomization test for each of the three retained PCA components. The first test is analogue to  
the representation of used and available microsites in multidimensional scatterplots and the  
evaluation of the spatial segregation between two classes of points. The test was a 3-D extension  
275 of a 2-D point pattern spatial analysis that classifies each point by its type and that of its nearest  
neighbour and compares the proportion of each kind of pair with that expected by chance (i.e., a  
join-counts analysis of a binary label according to a nearest-neighbour matrix, testing for

differences against a random labelling model: Dale et al. 2002, Fortin & Dale 2005). The number of pairs of equally labelled points will be greater than expected by chance if used points are aggregated or if there are available zones where there is no use (i.e., available points are aggregated). Global spatial segregation between classes of points was evaluated with a 2×2 contingency table, with expected frequencies and statistic ( $C$ , asymptotically distributed as chi-square with 2 d.f.) as proposed by Dixon (NN test; Dixon 1994). When significant evidence of global segregation was found, each type of pair was tested with an asymptotically normal  $Z$  statistic (Dixon 1994). Statistical analysis were done in R (R Core Team 2013), modifying the functions provided by P. Dixon (Dixon n.d.) to a multidimensional case to obtain the matrix of Euclidian distances between points and identify nearest neighbours in a 3-D case.

To evaluate selection on each principal component, the null hypothesis that microhabitat characteristics of used devices are a random sample of those of the available ones was tested with randomization tests (Crowley 1992, Potvin & Roff 1993, Adams & Anthony 1996). Statistics of central tendency (mean, median) and dispersion (variance) were calculated from 4999 or 1999 samples, respectively, of the same size as observed (used), taken without replacement from the available values, to evaluate selection consisting in a skewed use of lower or higher values of the environmental variable (resulting in lower or higher mean or median) and selection consisting in avoiding extreme or central values (lower or higher dispersion, respectively; see James & McCulloch 1990, Clark & Shutler 1999, Hirzel et al. 2002). Results based on the median of the distributions were very similar to those based on the mean, so they are not presented. A pseudo- $P$  value associated to the hypothesis that the observed statistic was obtained by chance was calculated as double the number of equal or more extreme values than the observed in the distribution, divided by the number of samples taken including the observed

(i.e., a two-tailed test). Spatial autocorrelation of PCA scores was rare (see below), so no correction was applied to statistically evaluate selection hypotheses at the microhabitat scale.

Two sets of confidence intervals and probabilities were calculated, based on different null models. First, randomly chosen values were obtained in each iteration from the 300 values of all available microhabitats to evaluate selection assuming no selective use of space at bigger scales (up to the extent of the study). Second, a stratified null model was done to control for a possible habitat selection at the grid scale (i.e., assuming a hierarchical use of space based on the observation that grids differed systematically in the proportion of used devices, see below). Under this model, random samples of the same size as observed were taken from each grid, so the expected mean value was an average of the mean values of the three grids weighted for the number of used devices in each of them.

#### *Foraging site selection based on device position*

To analyse the influence of location (cf. microhabitat features) on the use of a device, seed removal in each 10×10 grid was examined for spatial autocorrelation using spatial analyses for non-continuous data, assuming an isotropic process. Spatial autocorrelation of seasonal seed removal and of microhabitat characteristics were evaluated comparing a measure of similarity between pairs of points given by their position with another determined by the focal variable (agreement between two matrices of similarity; Dale et al. 2002). Discrete Euclidian distances between devices (from regular grids) were aggregated in four distance classes up to half the size of a grid side: <8.5 m (nearest 8 neighbours of a focal central grid point), 8.5–12.5 m (12 neighbours), 12.5–17 m (16), and 17–22 m (24). Relationship between points given by distance (known as matrix of weights,  $W$ ) were considered binary, with 1 indicating that two points are separated by a distance in the focal distance class, and 0 otherwise. Two similar spatial analyses

were used according to the type of variable (Dale et al. 2002, Fortin et al. 2002, Perry et al.  
325 2002). An analysis of join-counts was used to evaluate spatial autocorrelation of seasonal seed  
removal (a binary variable) in each distance class (Rosenberg 2001). This is simply counting the  
number of points joined (i.e. they are separated by a distance in the focal distance class) that  
share a property (i.e., both have been used in the same season). For continuous variables (values  
of the main PCA axes, distance to trees), Moran's *I* statistic was used. Results from both analyses  
330 are shown in correlograms which can be interpreted in a similar way: values higher than  
expected indicate a positive spatial autocorrelation at the focal distance class (i.e., aggregated  
pattern), and values significantly low indicate negative spatial autocorrelation (i.e., overdispersed  
or regular pattern).

The number of pairs of devices that were both used (1–1 joins) was compared against  
335 expectations from two different models. The first one is a model of complete spatial randomness  
(CSR) in which the probability of use of a device follows a homogeneous Poisson process  
depending only on the observed number of devices used in a grid, with no spatial interaction  
(i.e., all devices have the same chance of being used independently of its neighbours). The  
second model (distance-to-tree model, DTT) is a very simple heterogeneous Poisson process to  
340 illustrate aggregation of seed removal from first order or induced autocorrelation associated with  
distance to tall trees. This analysis tests the observed configuration keeping the observed  
composition, edge effects and potential habitat selection at bigger scales (i.e. different use of  
grids), assuming no second order autocorrelation (i.e., the use of a device is independent of that  
of its neighbours except for the modelled first order autocorrelation). The expected distribution  
345 of the statistic under each model was estimated with 1999 random samples of grid points of the  
same size as observed (with no replacement). For CSR model, all points shared a single  
probability to be selected. For DTT model, probability of use was chosen to vary discretely and

inversely with distance to the nearest tall tree: a device had a relative probability of use of 0.6 if at <5 m or 0.3 if at 5–10 m of an algarrobo >4m high and a probability of 0.1 if at <10 m to the nearest tree >3 m high; points at >10 m of any tall tree (none in grid J, 4 in F and 26 in V) had no chance of being selected (probability = 0). Expected values (median) and limits of confidence intervals (percentiles 2.5% and 97.5%) were obtained from each of the generated distributions, estimating the probability  $P$  that the observed value belongs to the distribution under the expected model as two times the proportion of equal or more extreme values than the one observed, including it (i.e., a two-tailed test with  $n = 2000$ ). Algorithms for resampling and joint counts estimation were programmed in R (R Core Team 2013). Moran's  $I$  statistics for continuous variables were analysed in a similar way, comparing them against a CSR model as implemented in the software PASSAGE (Rosenberg 2001). Complementary spatial analyses with alternate techniques (SADIE: Perry & Dixon 2002) provided similar evidence (see Milesi 2006).

## 360 RESULTS

The number of devices where the single seed was removed varied among seasons and grids. Seed removal was higher in autumn and winter and decreased in spring to summer in each of the three grids, which showed a consistent relative level of use: J had always higher seed removal, followed by F, and then V (Fig. 1). Both SEASON and GRID (and not their interaction) were relevant predictors of the number of devices used, with the spatial position at GRID scale an even stronger predictor than SEASON (Table 1).

Seed removal from a particular device in a grid was not independent among seasonal trials (J:  $\chi^2_4 = 80.23$ , F:  $\chi^2_4 = 19.90$ , V:  $\chi^2_4 = 42.02$ ; all:  $n = 100$ ,  $P < 0.001$ ). There were more observations in the categories “always used (4/4)” and “never used (0/4)” than expected if seed-offer devices in a grid were randomly and independently used each season.



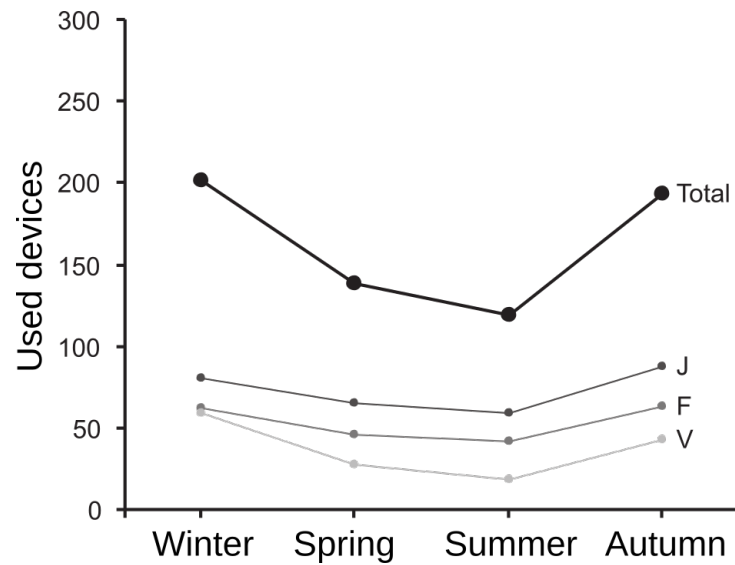

Figure 1. Number of devices where the seed was removed in at least one of the two days offered per season and grid. Total number of devices available was 300 in each season, arranged in three 10×10 grids (J, F, V).

375

Table 1. Analysis of deviance of nested binomial GLMs (*logit* link) obtained through backwards elimination from the full model, with temporal (SEASON, four categories) and spatial (GRID, three categories) heterogeneity as predictors of the proportion of used devices in each experiment. Minimum adequate model is shown in bold and includes both main effects (model 2).

380

| Model (~ predictors)                          | Residual d.f. | Residual deviance | test           | Δ deviance [d.f]  | P            |
|-----------------------------------------------|---------------|-------------------|----------------|-------------------|--------------|
| 1 Full model (~ Season * Grid)                |               |                   |                |                   |              |
| <b>2 Main effects model (~ Season + Grid)</b> | <b>6</b>      | <b>10.423</b>     | <b>2 vs. 1</b> | <b>10.423 [6]</b> | <b>0.108</b> |
| 3 Temporal model (~ Season)                   | 8             | 124.506           | 3 vs. 2        | 114.083 [2]       | <0.001       |
| 4 Spatial model (~ Grid)                      | 9             | 83.665            | 4 vs. 2        | 73.242 [3]        | <0.001       |
| 5 Null model                                  | 11            | 191.038           | 5 vs. 2        | 180.614 [5]       | <0.001       |

### *Vegetation and soil characteristics*

The first three components of PCA on ten characteristics of vegetation and litter measured at the microhabitat scale (around seed offer devices) retained 73% of the variability in the correlation matrix (Table 2). The first component (PC1) represented general vegetation cover, with positive values associated with tall shrubs and litter and negative values with open areas and bare ground. The second (PC2) was associated with tree cover (to the positive values), and the third (PC3) with the rest of perennial vegetation: grasses to the positive and low shrubs to the negative values. These components can be associated with the soil seed bank according to previous local results based on sampling microhabitats categorized *a-priori* at field: total seed abundance in the soil should be associated with positive values of PC1 and PC2, and grass seed abundance to positive values of PC3 (Fig. 2).

Table 2. Results of the Principal Components Analysis of the ten variables measured at the microhabitat scale. Main loadings for the three retained components are shown in bold.

|                           | PC1           | PC2          | PC3           |
|---------------------------|---------------|--------------|---------------|
| Grasses                   | 0.334         | -0.138       | <b>0.648</b>  |
| Dry standing grasses      | 0.085         | 0.061        | <b>0.752</b>  |
| Low shrubs                | 0.502         | 0.339        | <b>-0.435</b> |
| Tall shrubs (< 1m)        | <b>0.789</b>  | -0.392       | 0.129         |
| Tall shrubs (> 1m)        | <b>0.767</b>  | -0.396       | 0.133         |
| Trees (< 1m)              | 0.017         | <b>0.850</b> | 0.040         |
| Trees (> 1m)              | 0.121         | <b>0.865</b> | -0.128        |
| No vegetation             | <b>-0.872</b> | -0.162       | -0.176        |
| Bare ground               | <b>-0.875</b> | -0.301       | -0.167        |
| Dense litter              | <b>0.877</b>  | 0.292        | 0.094         |
| Eigenvalue                | 3.892         | 2.121        | 1.295         |
| % variability explained   | 38.9          | 21.2         | 12.9          |
| % variability accumulated | 38.9          | 60.1         | 73.1          |

395

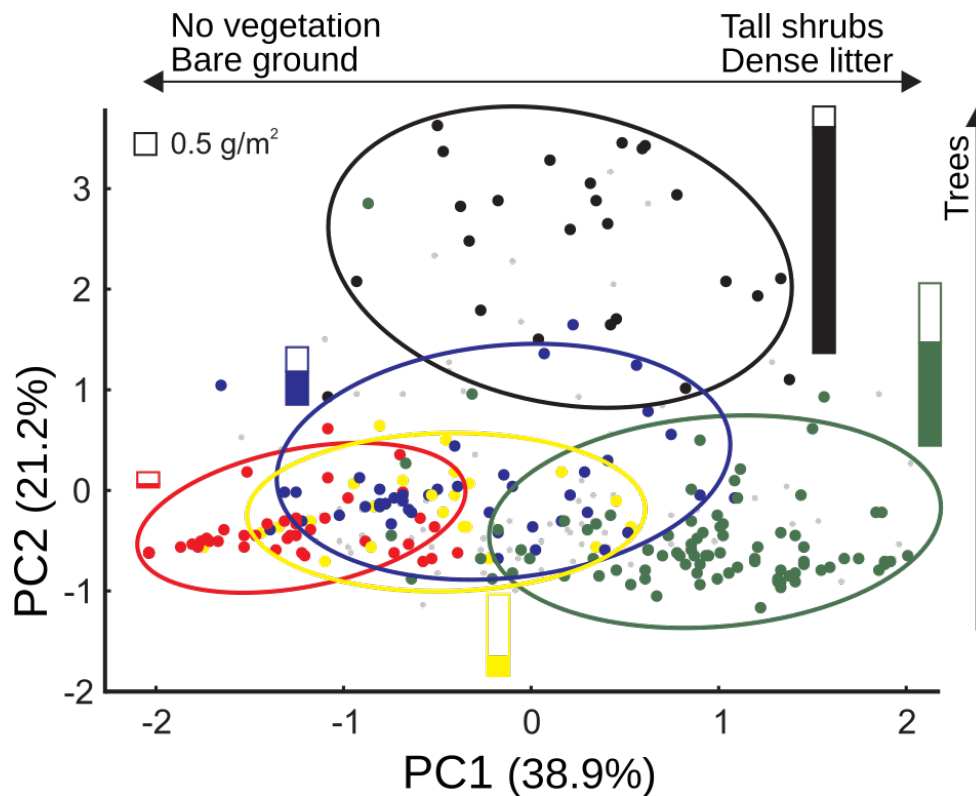

Figure 2. Position of the 300 seed-offer devices according to the first two components of a PCA on ten vegetation and soil variables measured at the microhabitat scale. Microhabitats are identified by their *a priori* categorization at field according to previous studies of the soil seed bank (Marone & Horno 1997, Marone & al. 2004): beneath tree canopy (black), beneath tall shrubs (green), beneath low shrubs (blue),  
400 beneath grasses (yellow) and bare soil (red). Smaller gray points were microhabitats with intermediate characteristics according to those criteria. Ellipses include at least 90% cases in each category. Bars show the biomass of forb (full) and grass (open) seeds of each microhabitat category during the same winter of the field experiment (L. Marone, unpublished data). Relative sizes of bars look similar if number of seeds,  
405 instead of biomass, is represented ( $0.5 \text{ g/m}^2 \approx 2000 \text{ seeds/m}^2$ ).

The three grids were generally similar in their vegetation and soil characteristics at this scale though differed slightly on the distribution of their microhabitats over some PCA components: there were more microhabitats covered with low shrubs in V and with grasses in F (low and high

values in PC3, respectively), and some more devices under trees in J than in V (PC2) (Kruskal-Wallis tests,  $k = 3$ ,  $n = 300$ ; PC1:  $H = 0.48$ ,  $P = 0.78$ ; PC2:  $H = 5.28$ ,  $P = 0.07$ ; PC3:  $H = 21.68$ ,  $P < 0.01$ ). Mean distances from devices to nearest tall trees showed higher differences among grids: devices in grid J were closer in average to a tree  $>3$  m high (distance to nearest tree: 415  $2.69 \pm 2.27$  m), F was intermediate ( $3.49 \pm 3.05$  m), and V devices were farther away in average ( $6.66 \pm 4.45$  m; K-W test: 48.69,  $P < 0.001$ ). A similar though slightly stronger pattern was found for distances to only the tallest algarrobos ( $>4$  m high; J:  $5.60 \pm 4.22$  m; F:  $8.63 \pm 5.51$  m; V: 420  $13.18 \pm 7.83$  m; K-W test: 55.39;  $P < 0.001$ ). Since this pattern matched observed levels of seed removal among grids, selection of characteristics associated with the devices were explored in analyses both pooling grids (i.e., analysis at the habitat extent) and within each grid.

#### *Foraging site selection based on microhabitat characteristics*

There were used devices across all the multivariate space defined by the three PCA components on vegetation and soil characteristics at the microhabitat scale (Fig. 3). However, seed removal was not completely random: used devices in spring and summer (pairs  $N_{11}$ ) and 425 non-used devices in spring (pairs  $N_{00}$ ) were more aggregated than expected by chance (Table 3).

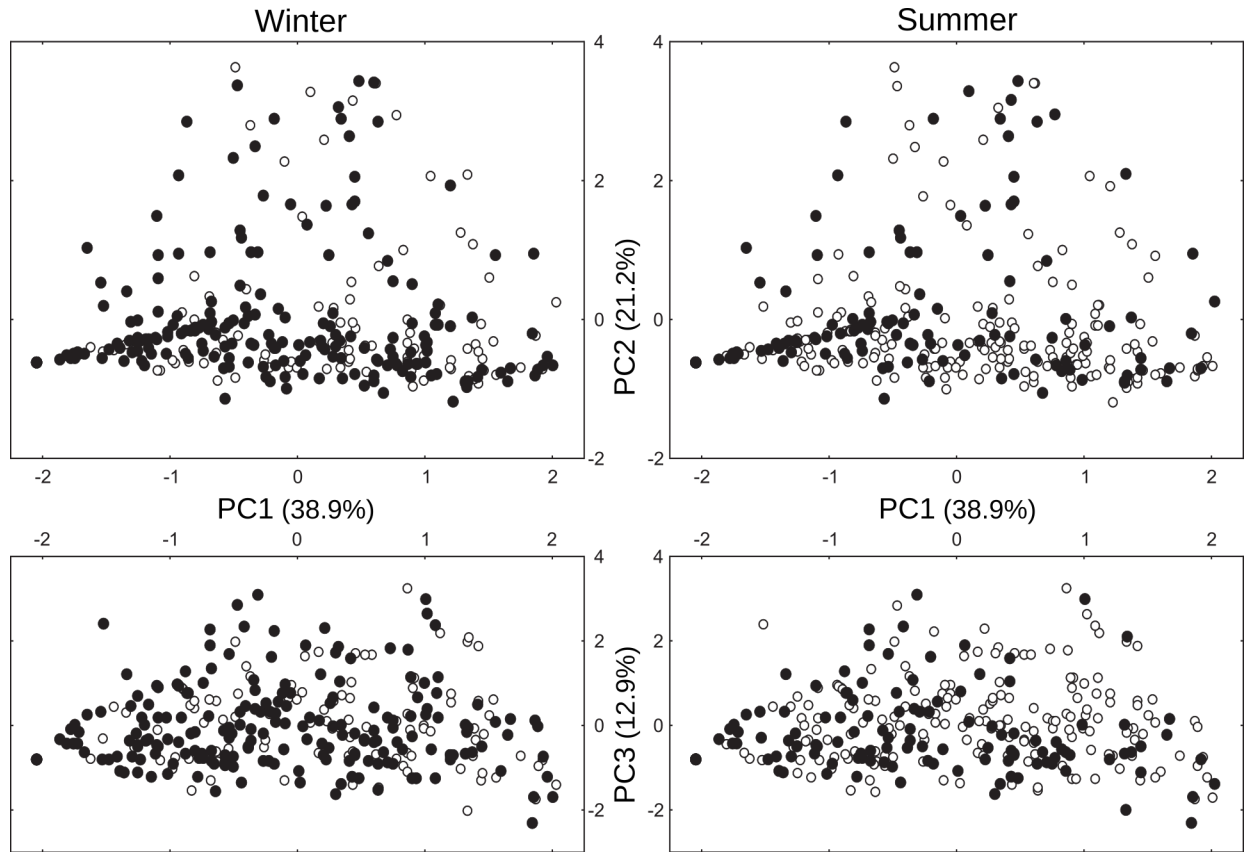

Figure 3. Distribution of used devices (filled circles) in the season with more (winter) and less (summer) seed removal in the multidimensional space of the three first components of a PCA on vegetation and soil characteristics at the microhabitat scale. Point patterns in autumn were similar to those in winter, and in spring to summer's.

430

Table 3. Analysis of segregation of used and non-used devices in the 3D-space generated by the first three components of a PCA on ten variables measured at microhabitat scale. The observed and expected number of pairs of nearest-neighbour points that were both used ( $N_{11}$ ) or non-used ( $N_{00}$ ) in each seasonal experiment are shown, together with the statistic ( $C$ ) testing for global spatial segregation between classes of points against the null hypothesis of “random labeling”, and the statistic ( $Z$ , between brackets) testing the same hypothesis for each kind of pair. A significantly higher number of pairs observed than expected indicates positive spatial correlation (aggregation, in bold).

|          | observed/expected | $C$ ( $Z$ )    | $P$          |
|----------|-------------------|----------------|--------------|
| Winter   |                   | 0.271          | 0.873        |
| $N_{11}$ | 131/134.5         | (-0.510)       | 0.610        |
| $N_{00}$ | 32/32.5           | (-0.083)       | 0.934        |
| Spring   |                   | 12.747         | 0.002        |
| $N_{11}$ | <b>85/63.2</b>    | <b>(3.380)</b> | <b>0.001</b> |
| $N_{00}$ | <b>103/87.2</b>   | <b>(2.328)</b> | <b>0.020</b> |
| Summer   |                   | 5.895          | 0.052        |
| $N_{11}$ | <b>61/47.0</b>    | <b>(2.339)</b> | <b>0.019</b> |
| $N_{00}$ | 119/109.0         | (1.464)        | 0.143        |
| Autumn   |                   | 2.452          | 0.293        |
| $N_{11}$ | 114/123.9         | (-1.457)       | 0.145        |
| $N_{00}$ | 38/37.9           | (0.012)        | 0.991        |

Unidimensional analysis along each PCA component also indicated that the probability of a seed being removed is not independent of the main characteristics at the microhabitat scale. In all seasons, there were some differences in one or more components between the mean value of explored microhabitats and the expected mean under the null model (Fig. 4). However, evidence of foraging selection depended on the null model assumed. In the analysis at the habitat extent, there was a preference for devices in microhabitats with less cover of shrubs and litter (PC1) in all seasons, in microhabitats with trees in spring and summer (PC2), and with less grasses (or more low shrubs) in summer (PC3). Variances of scores of used devices were no different from those expected by chance in any component or season, even when different means were detected

450 (i.e., even when means differed, characteristics associated to used devices were as variable as those available). When the analysis controlled for the possible hierarchical selection at the grid level with a stratified null model, skewed use was still observed on PC1, favouring microsites without cover and litter in all season, but significant selection along PC2 practically disappeared and preference on PC3 for microhabitats with no grasses became stronger (statistically  
 455 significant in spring, summer and autumn; Fig. 4).

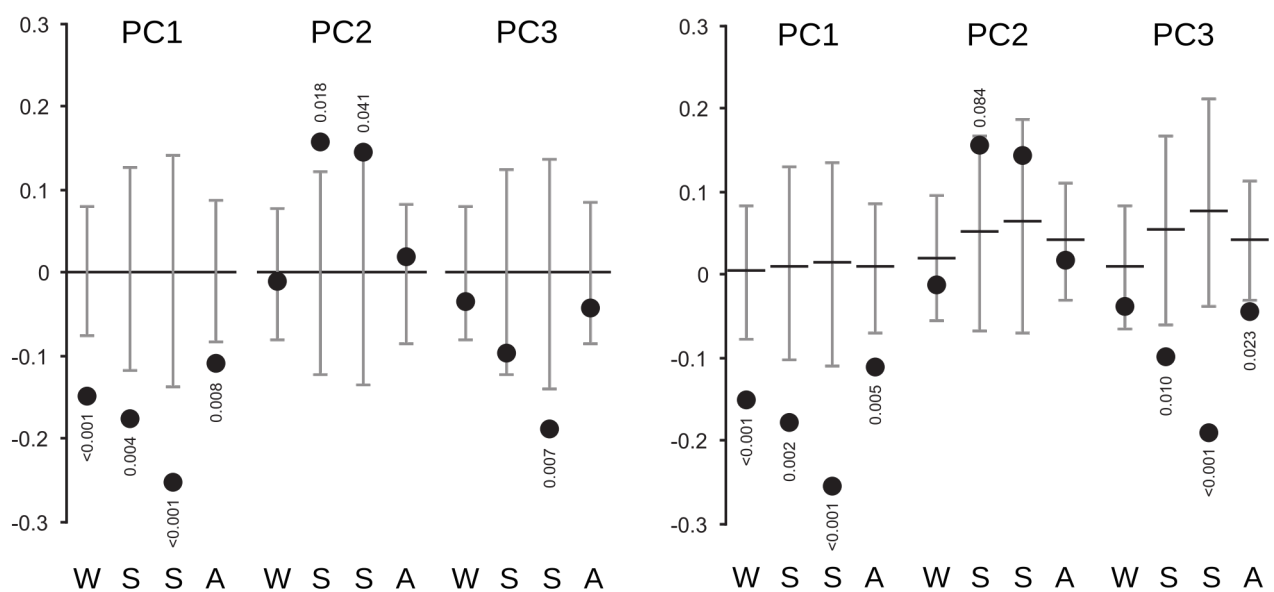

Figure 4. Mean scores of used devices in the first three components of the PCA (black circles) in each season (from winter [W] to autumn [A]), controlling (right panel) or not (left panel) for potential selective use of space at the grid scale. Black horizontal line is the expected value and whiskers show the 95% confidence interval under the null hypothesis of no selection. Pseudo P-values not shown when  $P > 0.1$   
 460 (two-tailed test).

### *Foraging site selection based on microhabitat position*

In several seasonal trials there was a positive spatial association of seed removal at short distances (5–7.5 m). Neighbouring devices (i.e., separated by the first distance class) were both

465 used more frequently in spring ( $P = 0.018$ ) and autumn ( $P = 0.023$ ) in grid F, and in spring  
 ( $P = 0.006$ ) and summer ( $P = 0.001$ ) in grid V, than expected by chance (Join-counts analyses  
 against CSR null model; Fig. 5). Similar patterns, though statistically non-significant, were  
 observed for other seasonal trials in the same two grids (winter in F:  $P = 0.071$ ; autumn in V:  
 $P = 0.103$ ). No significant spatial pattern was detected in grid J. Correlogram slopes (i.e., how  
 470 autocorrelation changes with distance) were always steeper in spring and summer than in autumn  
 and winter (Fig. 5).

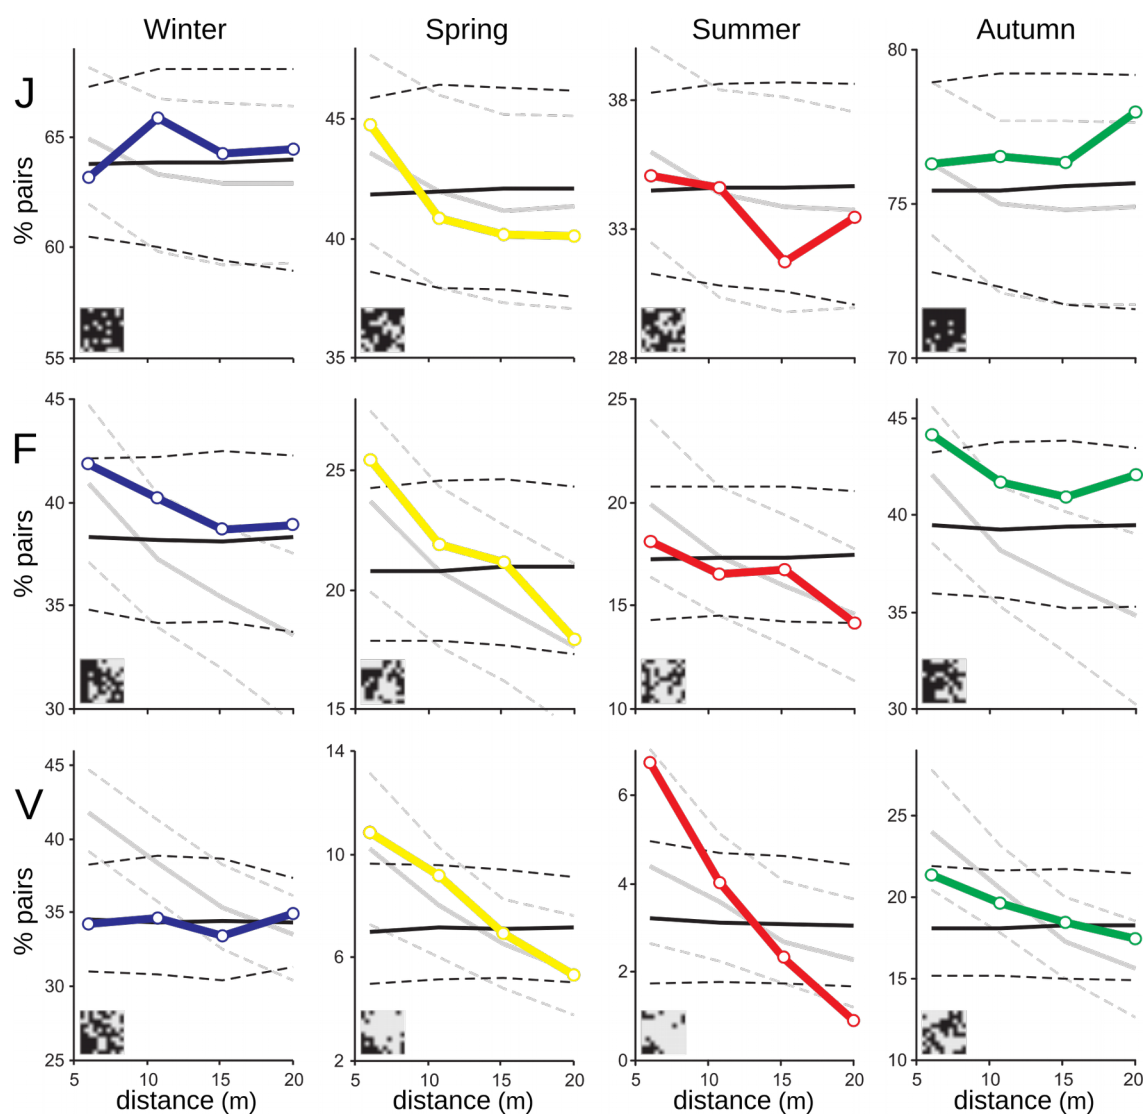



475 Figure 5. Percentage of used-used pairs of devices along four distance classes in each season in three  
10×10 grids (J, F, V). Black lines show the expected percentage (continuous) and 2.5% and 97.5%  
percentiles (broken) of used-used pairs under a complete spatial randomness (CSR) model. Gray lines  
show the same three statistics under a spatially heterogeneous model that considers a negative influence  
of increasing distances to tall trees (see details in text). Actual patterns of seed removal are shown as  
insets in the bottom left corner of each subfigure, with used devices in black.

480

Spatial aggregation of seed removal was not a direct consequence of spatial autocorrelation of  
vegetation characteristics at the microhabitat scale (Fig. 6): (1) PC1, the component more  
consistently associated with seed removal (Fig. 4) was not spatially autocorrelated; (2) PC2 was  
positively autocorrelated in grid V at the first distance class but was not significantly relevant in  
485 explaining seed removal once the effect at the grid scale was controlled for; and (3) PC3 was  
positively autocorrelated in grid J and at the second distance class in F, both at which there was  
no evidence of autocorrelated seed removal (Fig. 5).

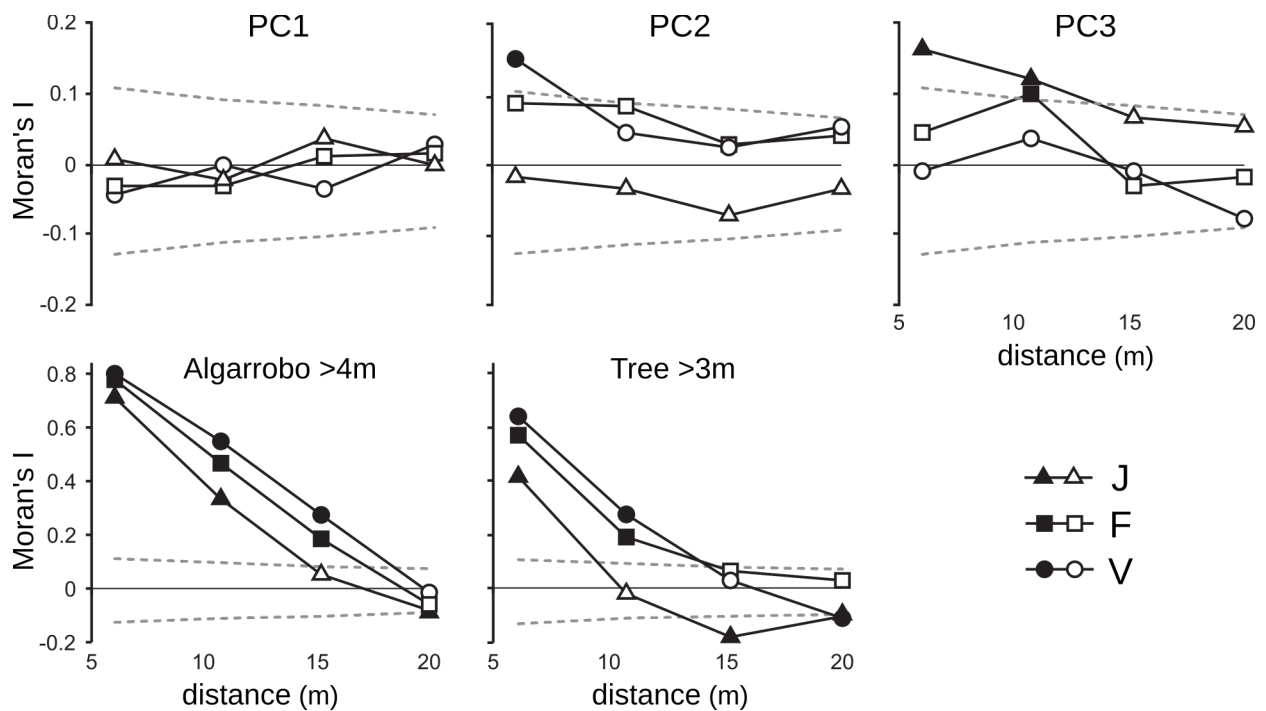

490 Figure 6. Correlograms of synthetic variables (after a PCA) with characteristics of the vegetation at  
microsite scale and of two variables of distance to tall trees in the three 10×10 grids (J, F, V). Broken  
lines are the 2.5% and 97.5% percentiles of the Moran's I values expected by chance under a complete  
spatial randomness model (CSR); full symbols show values outside those point-wise intervals (i.e.,  $P <$   
0.05).

495 In contrast, distance from devices to tall trees showed a strong positive autocorrelation  
(Fig. 6) as a consequence of many neighbouring devices sharing the same nearest tall tree (26.7–  
68.0% distances from a device to the closest tall algarrobo were  $>5$  m). Correlograms describing  
autocorrelation of seed removal were more similar to those of a heterogeneous Poisson model  
with tall trees as main predictor (DTT model, Fig. 5). Observed correlograms in grids V and F  
500 were more similar to DTT model in spring and summer, particularly at short distances, while  
autumn-winter pattern were intermediate or more similar to CSR models, particularly at longer  
distances. In grid J both models had similar predictions as a consequence of the higher

abundance and more uniform distribution of tall trees; no observed pattern would have statistically distinguished between the two null models.

## 505 **DISCUSSION**

As a consequence of evolutionary or behavioral adaptation, foragers should be able to track spatial variations in food abundance when coupled to perceptible environmental cues (Bell 1990, Schmidt & Brown 1996, Fierer & Kotler 2000, but see Fawcett et al. 2013). We tested the hypothesis that exploration of foraging patches by postdispersal granivorous birds is guided by environmental features consistently associated with seed abundance in the soil of a desert. We offered scattered single seeds at field in seasonal trials to detect selective spatial patterns by foraging birds and analyze their association with vegetation and soil characteristics at the microhabitat scale. Our multivariate characterization of vegetation heterogeneity at microhabitat scale (1–2 m diameter) proved consistent among studies in this habitat (*algarrobales* at Ñacuñán, in the central Monte desert, Argentina; cf. Milesi et al. 2008) and matched the main vegetation features involved in criteria categorizing microhabitats for previous analyses of the soil seed bank (Marone & Horno 1997, Marone et al. 2004). Therefore, foraging spatial patterns at this scale can be interpreted according to our previous knowledge on seed bank abundance, composition and dynamics. We start by discussing the experimental field technique used and the consistent evidence it provided, then focus on our main hypotheses on selective patterns of seed removal by granivorous birds at the microhabitat scale, and finally discuss birds' foraging patterns at bigger spatial scales, their seasonal variation and their potential causes and implications.

*Postdispersal granivory by birds as inferred from seed-offer field trials*

525 From results of Mares & Rosenzweig (1978) onwards, several authors have assumed that  
desert birds rarely find, or are slow to detect, experimental seed dishes or trays (e.g., Abramsky  
1983, Parmenter et al. 1984, Kerley 1991; see Marone et al. 2000b, Weisz et al. 2012). This  
would set a strong limit to short-term field experiments that avoid baiting or training birds, so it  
is not surprising that most seed-removal trials have exploited the “magic pudding effect”  
530 (Bedoya-Pérez et al. 2013) to, intentionally or not, emphasize the exploitation rather than the  
exploration component of foraging. Contrastingly, our experimental scattered seeds were readily  
found and removed by local birds during the first day of every seasonal trial, even when seed  
addition at the grid scale was nil (100 seeds in ~0.2 ha, or <1.5 g/ha). The relevance of small  
granivorous desert birds to exploit scarce, dispersed seed resources could be higher than  
535 previously considered, or at least it should not be assumed poor by extrapolating observations  
from other regions.

The identification or control of selective access by different granivorous taxa is a typical  
problem in seed bait studies (Weisz et al. 2012), usually involving physical barriers that do not  
always prove successful (Christianini & Galetti 2007, Brown et al. 2016, *pers. obs.*). We tested  
540 and used a day–night criterion calibrated by recording foot tracks over fine soil around ant-proof  
seed-offer devices. In this environment, single-seed offer proved a very simple, quick, scalable  
and economic solution for studies with higher resolution or spatial extent, and facilitates the  
assumption that experimental seed removal reveals the usual use of foraging space by  
granivorous birds. Radiotelemetry (e.g., Macias-Duarte & Panjabi 2013) or videographic  
545 techniques (e.g., Mokotjomela et al. 2014, Brown et al. 2016) may be more precise or complete

alternatives (see also Bedoya-Pérez et al. 2013), though they are more expensive, time-consuming and limited to a minimum scale of resolution or a lower number of focal places.

Seasonal variation in seed removal by birds proved consistent within and across studies, adding another evidence in support of this technique to estimate postdispersal granivory. Seed removal was always highest in autumn and winter and decreased in spring to a minimum in summer. This seasonal pattern, repeated in each grid of our field study, was also evident after direct observations of small granivorous birds foraging on the ground (Milesi et al. 2008) and by measuring seed biomass removed from 25–50 *ad libitum* trays (Lopez de Casenave et al. 1998; see figure 3.21 in Milesi 2006 for a graphical comparison of these results). Reported local changes in abundance and diet of these small granivorous birds also match. The granivorous guild changes along the year with the arrival of some migrant birds during autumn and winter, particularly the abundant southern subspecies *Zonotrichia capensis australis* (Sagario et al. 2014). Though the arrival of *Poospiza ornata* for the breeding season (Cueto et al. 2011) partially compensates the departure of *Z. c. australis* in spring, all postdispersal granivorous birds reduce their seed intake in spring and summer to include insects and fruit in their breeding diets (Lopez de Casenave 2008, Milesi et al. 2008).

Spatial patterns of seed removal may be wrongly inferred if seed quantity or quality in the soil around the experimental device correlate negatively with the probability of removal of the focal seed (safety-in-numbers or dilution effect): patch use would appear higher in poor microhabitats even when birds were spatially non-selective. However, this interpretation does not seem probable for a number of reasons: (1) these experimental seeds are taxonomically similar to some naturally available but preferred and abundantly removed when offered *ad libitum* (e.g., Lopez de Casenave et al. 1998), (2) removal of single seeds did not differ from removal of

groups of ten seeds in a pilot study, suggesting that birds completely remove groups of  
570 experimental seeds when they are easily available in an accessible artificial patch, and (3) we  
never found bird footprints around a device with the seed unremoved in our additional field trial  
(see *Methods*). Notwithstanding, inferences on use of foraging space may include an  
experimental artifact if, in spite of precautions (device surface covered in natural soil, single  
seeds offered in short and isolated trials to reduce reward and minimize learning), seed devices  
575 were still particularly attractive for birds. Even if true, this should still reveal the spatial  
preferences of these birds when exploring their habitat for suitable foraging patches.

#### *Bird exploration and microhabitat characteristics*

Postdispersal granivorous birds were less selective in their use of foraging space than  
expected if patch appearance (i.e., visual, remotely-perceivable environmental surrogates that  
580 provide reliable information on relative patch profitability) were providing them information to  
avoid poor or unprofitable patches. Variability in main microhabitat features was similar around  
used and available devices, suggesting that no kind of microhabitat is safe from bird exploration.  
Still, seed removal was not spatially random. Birds repeated the use of experimental devices at  
particular positions in consecutive days of each trial and along the seasonal trials in spite of  
585 intra-annual variations in seed abundance and distribution and in bird abundance, guild  
composition and behavior. This suggests that some permanent features associated to each  
individual foraging patch may still have a (non-restrictive) influence on its probability of  
exploration. Strikingly, the only consistent selective pattern, analyzed at both habitat and grid  
extents, was against previous expectations based on bottom-up behavioral effects. Microhabitat  
590 exploration in all seasons was skewed towards those with less perennial vegetation and litter  
cover, and in most cases with less grasses, all characteristics associated with fewer seeds in the

soil bank. This selective use of space by birds at microhabitat scale allows an interpretation closer to a top-down spatial effect, a cause (and not a consequence) of the seed bank dynamics.

595 Marone et al. (2004) reported grass seed abundance in the soil becoming more homogeneous among microhabitats with time after primary dispersal, and Marone et al. (2008) found that granivory may account for up to a 50% reduction of preferred, naturally accumulated grass seeds in open microhabitats.

600 During summer and autumn, birds may be targeting recently produced seeds that preferentially enter the seed bank through open spaces during primary dispersal (Marone et al. 1998a). Under this scenario, a more appropriate bottom-up model for microhabitat use by granivorous birds should focus on seed renewal rates (Price & Joyner 1997, Ben-Natan et al. 2004) rather than on the accumulated soil seed bank (following the general approach of an ideal free distribution model), or involve spatial autocorrelation or context at bigger scales to examine revisiting strategies such as cropping or traplining (Bell 1990). Still, foraging patterns from 605 winter to early summer (when seed renewal rates are low because primary dispersal of grass seeds have already ended and most seeds were already trapped in litter or small depressions in the soil during secondary dispersal by wind and water; Marone et al. 1998a), do not seem to match predictions based on neither new nor accumulated seeds on the soil. Instead, birds may be guiding their search for seeds towards bare soil patches because of their detectability or 610 accessibility (Whittingham & Markland 2002, Jones et al. 2006, Baker et al. 2009). Surface seeds on bare soil may be more easily detected or extracted by most local bird species than those trapped within dense litter under woody cover (Cueto et al. 2013).

In summary, according to their patterns of single-seed removal, granivorous birds in the algarrobal of the central Monte desert seem to explore every kind of microhabitat, ignoring

615 visual information embedded in vegetation structure and soil cover to optimize their exploration  
for profitable foraging patches (behaving as myopic foragers *sensu* Mitchell 1989). The  
conclusion that they are unable to perceive bold characteristics of the vegetation is not  
straightforward, nor that their cognitive abilities do not allow them to recognize the distribution  
of patch qualities or develop a patch-searching rule based on them. Postdispersal seed foraging in  
620 a desert, i.e., one with high spatial variability and low encounter stochasticity (abundant small-  
sized prey) in a temporally changing environment, should favour the evolutionary value of  
learning over that of fixed strategies and parameters for the improvement of patch assessment  
rules (Eliassen et al. 2009). Then, those same evolved behavioural mechanisms to cope with this  
spatio-temporal variation (e.g., sample every patch so to increase survival when under extreme  
625 conditions) may not allow birds to satisfy predictions of optimality under a locally fixed, more  
beneficial set of features (the behavioral gambit *sensu* Fawcett et al. 2013). A fixed or narrowly  
defined patch selection template may not be convenient (enough) in a variable and dynamic  
system (Rotenberry & Wiens 1998) where a less-informed strategy may be ‘good enough’  
(Olsson & Brown 2010). It is also probable that the foraging scale of these birds is much smaller  
630 than the spatial scale at which perennial vegetation provides useful information (see Kohlmann  
and Risenhoover 1998, Fierer & Kotler 2000, Klaassen et al. 2006a, 2006b). Even when in the  
algarrobal the general association between seed bank and vegetation is strong and persistent at  
microhabitat scale (decimeters to meters; Marone & Horno 1997, Marone et al. 1998a, 2004,  
Milesi & Marone 2015, Andrade 2016), patches at the relevant scale for the birds may be more  
635 variable than we acknowledge, as a consequence of accumulation gradients, micro-topography,  
secondary dispersion and continuous consumption. In this scenario, general *static* information  
embedded in woody vegetation would lose value to guide exploration at the relevant scale for the  
birds: (nano)patch quality would become less predictable, with instant sampling required anyway



to search for and evaluate profitable patches (Vásquez et al. 2006, Stephens 2007, Eliassen et al.  
640 2007, Reynolds 2012). Additionally, the penalty of unfruitful exploration of poor patches may be  
counterbalanced by the ability to detect scattered rich patches with structural characteristics  
associated with low-quality areas, such as ephemeral patches of recently-fallen grass seeds or  
scattered depressions accumulating seeds in exposed areas (an usual feature in Ñacuñán and  
other deserts: Price and Reichman 1987, Marone et al. 2004). Milesi & Marone (2015) tested for  
645 other important factors (accessibility to foraging patches, foraging efficiency, thermoregulation  
or predation risk) that may affect patch selection by birds at microhabitat scale, and although  
seed abundance was the main predictor, they also found sparrows frequently exploring the  
poor/variable patch, a behaviour that can be expected when not under immediate risk of  
starvation (Dall & Johnstone 2002) or as an attempt to avoid learning predators by being  
650 unpredictable in space (Lima 2002, Mitchell & Lima 2002).

*Bigger scales: influence of context on foraging patch exploration*

Bigger spatial scales proved more relevant to describe heterogeneity in bird foraging in this  
habitat. Seed removal differed consistently among three grids (~0.2 ha) that were haphazardly  
established in the algarrobal, even when they proved similar according to main characteristics of  
655 the vegetation at the microhabitat scale. In the most used grid (“J”) every microhabitat appeared  
“suitable enough” (only 4 out of 100 devices were never used) while in the other two (“F” and  
“V”) birds behaved more selectively. In fact, differences in the amount of seeds removed from  
each of our grids were even higher than between seasons, which was a strikingly strong and  
repeatable pattern itself (illustrating an additional challenge for attempts at global explanations  
660 of granivory rates derived from one-shot seed-offer experiments; e.g., Folgarait et al. 1998, Peco  
et al. 2014). Moreover, seed removal in autumn-winter showed a random pattern at longer intra-

grid distances with a tendency for aggregation at small distances, but in spring-summer it concentrated in areas of a relatively constant size, leaving the rest almost without exploration. In consequence, inferences on the selective use of microhabitats depend on how birds' use of space at bigger scales is assumed. Since the first PCA component was not spatially autocorrelated at  $\geq 5$  m, inferences are not modified when controlling for spatial dependencies, but selective patterns identified along the other PCA components may follow from selective use at bigger scales. For example, the preference for tree microhabitats in spring and summer under the simplest analysis (at the habitat extent, i.e., pooling grids) disappeared when controlling for the differential use of each grid (with a stratified analysis or taking any of the grids as extent). It is well established nowadays that most ecological patterns depend on scale, including habitat selection and foraging patterns resulting from the combination of degrees of preference at different scales (Jones 2001, Morrison et al. 2006, Lopez de Casenave et al. 2007, Mayor et al. 2009). Although the evaluation of spatial dependences at bigger spatial scales than microhabitat was not our main goal, the influence of the scale of analysis on inferences suggests a selective use of foraging patches based not only on the characteristics of a device but also in its relative position among other devices or in relation to other structures.

Most notable among those influences was the negative association between seed removal by birds and distance to tall trees, both as a selective pattern among grid areas and within grids with enough variation for this variable. A simple heterogeneous Poisson model in which probability of seed removal was negatively related to distance to tall trees (assuming no further second-order interactions) successfully predicted a similar change in autocorrelation with distance in the two grids where it was observed and no autocorrelation in the third. A similar selective use of space around tall trees was also found by following foraging birds at field both for predispersive (directly from the spikes) and postdispersive (from the soil) seed consumption (Milesi et al.

2008) and it is not unusual elsewhere (e.g., Pulliam & Mills 1977). This preferential exploration of areas close to tall trees (but not exclusively under trees) does not seem related to seed abundance. Though we lack data on heterogeneity of seed abundance at this scale (e.g., tens of metres) or at different distances from trees within the algarrobal, previous local studies found no correlation between abundances of grass seeds and granivorous birds measured at a slightly bigger scale (200×100 m; Lopez de Casenave 2001), and average seed abundance was not very different even between close habitats differing markedly in tree cover (Marone et al. 1997, 2004). Birds may have preferred shaded patches beneath and around trees during summer for thermoregulation. Lopez de Casenave et al. (1998) also found birds being able to remove seeds at similar rates from *ad libitum* trays in both open patches and beneath trees in this habitat during winter but favoring seed removal under cover in summer. We evaluated this idea in an additional summer trial in grids J and V, with the same experimental design but tracking seed removal throughout the day (Milesi 2006). We observed (1) higher seed removal closer to tall trees in the heterogeneous grid (V) and no spatial pattern in the homogeneous one (J); (2) most seed removal occurred during the morning and afternoon and it was not related to shade; and (3) during midday hours, when shade becomes critical, seed removal was nil, even under cover (detailed results in Milesi 2006). Milesi & Marone (2015) also showed in controlled trials with single birds in field aviaries that extreme temperature or direct sunlight may pose a limit on foraging but can not be invoked as the single main reason for spatially selective foraging patterns.

705        Reproduction and predation are more probable causes of these spatial patterns.

Autocorrelation of seed removal coupled with higher probabilities of exploration closer to tall trees is to be expected if granivorous birds have reproductive territories or home ranges set around them. Finches and sparrows may be using these tall trees as important posts for antipredatory and territorial vigilance. The (stronger) association with trees in the reproductive

710 season cannot be explained by a central foraging model around nest sites since most nests of  
these granivores are not built on tall algarrobo trees but on shrubs, on the ground or in smaller  
*Geoffrea decorticans* trees (Mezquida 2003, 2004). Still, these small birds are territorial,  
particularly during spring and summer, when tall trees are preferred singing perches (Sagario  
2011, Sagario & Cueto 2014a, Zarco 2016). Seasonal variations in degree of aggregation around  
715 trees may also associate with changes in guild composition, movement patterns, territoriality and  
territory size, e.g., multispecies flocks in autumn-winter with high relative abundance of the  
migratory subspecies *Zonotrichia capensis australis* (Sagario & Cueto 2014b, Sagario et al.  
2014, Zarco & Cueto 2017). Affinity for tall trees may also be related to real or perceived  
predation risk, as interpreted in classic studies of foraging granivorous birds (e.g., Pulliam &  
720 Mills 1977, Schneider 1984, Lima et al. 1987, Schluter 1988, Watts 1991). Most local birds flee  
to the closest tall trees when disturbed within the algarrobal (*pers. obs.*) as frequently observed in  
other habitats with multi-layered vegetation structure. Foraging farther from tall trees may be  
associated with a higher risk of not reaching protective cover quick enough if attacked by a  
predator. This will trade-off against foraging related tasks, resulting in higher costs in terms of  
725 fitness (Brown & Kotler 2004, Verdolin 2006, Cresswell 2008). Further, seasonal variation in  
degree of aggregation around trees may relate to varying perception, evaluation or actual risk of  
predation (Watts 1991, Suhonen 1993, Lima & Bednekoff 1999). There was some support for the  
predation risk hypothesis in results of foraging selection trials within field aviaries by Milesi &  
Marone (2015).

730 Irrespective of which is the main cause, tall trees seem to determine a first level of selection  
that defines explorable space, and then microhabitat structure exerts an influence on which  
patches are effectively exploited (or more frequently explored) among the accessible ones. This  
is not an unusual conclusion when studying small ground-foraging birds (e.g., Schluter 1988,

Repasky & Schluter 1994, Watts 1996, Walther & Gosler 2001). In our case, openness (no  
735 woody cover), probably as a cause of better accessibility at ground level or to facilitate predator  
detection, seems more important at this smaller scale than vegetation features correlated with soil  
seed abundance. Moreover, this two-step explanation matches the two movement modes of these  
birds: flying between perches and from perches to the ground, and then walking on the ground  
while foraging. Short term seed-removal trials may not be long enough to reveal the existence of  
740 predation-free areas for seeds, but may still estimate their relative probability of being consumed  
according to the intensity of exploration of foraging patches by birds within their activity areas.  
Even when territories of granivorous birds in the algarrobal tend to be contiguous (Sagario  
2011), a selective use of space as hypothesised may cause a scenario of heterogeneous risk of  
predation for seeds (particularly for seed grasses preferred by birds), such as scarcely used  
745 patches far from tall trees. Then, heterogeneous removal of seeds in a seed-limited environment  
(this habitat: Andrade 2016) may cascade to the spatial distribution of plant populations.  
Expected foraging patterns under this multiscale hypothesis associated with birds' two-step  
movements should ideally be tested at bigger spatial scales, including higher degrees of  
environmental heterogeneity and more diverse distances to tall trees.

## 750 **ACKNOWLEDGEMENTS**

We thank L. Marone for partnership and valuable guidance at several stages. We acknowledge  
institutional and partial financial support from Aves Argentinas, CONICET, Universidad de  
Buenos Aires, IADIZA (CONICET-UNCuyo-Mendoza), and ANPCyT, all from Argentina. This  
is contribution number 103 of the Desert Community Ecology Research Team (Ecodes) of  
755 IADIZA (CONICET) and FCEN (Universidad de Buenos Aires).

## BIBLIOGRAPHY

- ABRAMSKY, Z. (1983) Experiments on seed predation by rodents and ants in the Israeli desert. *Oecologia* 57:328–332
- 760 ADAMS, D. C. & C. D. ANTHONY (1996) Using randomization techniques to analyse behavioural data. *Animal Behaviour* 51:733–738
- ANDERSON, C. J. & J. A. MACMAHON (2001) Granivores, exclosures, and seed banks: harvester ants and rodents in sagebrush-steppe. *Journal of Arid Environments* 49:343–355
- 765 ANDRADE, L. E. (2016) *Reclutamiento de plantas herbáceas en el desierto del Monte central: los papeles de la granivoría, la herbivoría y la vegetación leñosa*. Doctoral Thesis. Univ. de Buenos Aires, Buenos Aires
- BAKER, D. J.; R. A. STILLMAN AND J. M. BULLOCK (2009) The effect of habitat complexity on the functional response of a seed-eating passerine. *Ibis* 151:547–558
- 770 BEDOYA-PEREZ, M. A.; A. J. R. CARTHEY; V. S. A. MELLA; C. MCARTHUR & P. B. BANKS (2013) A practical guide to avoid giving up on giving-up densities. *Behavioral Ecology and Sociobiology* 67:1541–1553
- BELL, W. J. (1990) *Searching behaviour*. Springer Science+Business Media.
- BEN-NATAN, G.; Z. ABRAMSKY; B. P. KOTLER & J. S. BROWN (2004) Seeds redistribution in sand dunes: a basis for coexistence of two rodent species. *Oikos* 105:325–335
- 775 BROWN, A. J.; D. H. DEUTSCHMAN; J. BRASWELL & D. MCLAUGHLIN (2016) Remote cameras reveal experimental artifact in a study of seed predation in a semi-arid shrubland. *PLoS ONE* 11:1–16
- BROWN, J. S. & B. P. KOTLER (2004) Hazardous duty pay and the foraging cost of predation. *Ecology Letters* 7:999–1014
- CABALLERO, I.; J. M. OLANO; A. ESCUDERO & J. LOIDI (2008) Seed bank spatial structure in semi-arid environments: beyond the patch-bare area dichotomy. *Plant Ecology* 195:215–223
- 780 CAMÍN, S. R.; V. R. CUETO; J. LOPEZ DE CASENAVE & L. MARONE (2015) Exploring food preferences and the limits of feeding flexibility of seed-eating desert birds. *Emu* 115:261–269

- CHRISTIANINI, A. V. & M. GALETTI (2007) Toward reliable estimates of seed removal by small mammals and birds in the Neotropics. *Brazilian Journal of Biology* 67:203–208
- 785 CLARK, R. G. & D. SHUTLER (1999) Avian habitat selection: Pattern from process in nest-site use by ducks? *Ecology* 80:272–287
- CRESSWELL, W. (2008) Non-lethal effects of predation in birds. *Ibis* 150:3–17
- CROWLEY, P. H. (1992) Resampling methods for computation-intensive data analysis in ecology and evolution. *Annual Review of Ecology and Systematics* 23:405–447
- 790 CUETO, V. R.; L. MARONE & J. LOPEZ DE CASENAVE (2006) Seed preferences in sparrows species of the Monte desert: implications for seed–granivore interactions. *Auk* 123: 358–367
- CUETO, V. R.; F. A. MILESI & L. MARONE (2013) Litter and seed burying alter food availability and foraging efficiency of sparrow species in the central Monte desert, Argentina. *Journal of Avian Biology* 44: 339–346
- 795 CUETO, V. R.; F. A. MILESI; M. C. SAGARIO; J. LOPEZ DE CASENAVE & L. MARONE (2011) Distribución geográfica y patrones de movimiento de la Monterita Canela (*Poospiza ornata*) y el Yal Carbonero (*Phrygilus carbonarius*) en Argentina. *Ornitología Neotropical* 22:483–494
- DALE, M. R. T.; P. DIXON; M.-J. FORTIN; P. LEGENDRE; D. E. MYERS & M. S. ROSENBERG (2002) Conceptual and mathematical relationships among methods for spatial analysis. *Ecography* 25:558–577
- 800 DALL, S. R. X.; , L.-A. GIRALDEAU; O. OLSSON; J. M. MCNAMARA & D. W. STEPHENS (2005) Information and its use by animals in evolutionary ecology. *Trends in Ecology and Evolution* 20:187–193
- DALL, S. R. X. & R. A. JOHNSTONE (2002) Managing uncertainty: information and insurance under the risk of starvation. *Philosophical Transactions of The Royal Society B* 357:1519–1526
- 805 DIXON, PM (1994) Testing spatial segregation using a nearest-neighbor contingency table. *Ecology* 75:1940–1948
- DIXON, PM (N.D.) *R functions developed by Philip Dixon*. Retrieved April 2004 from <http://www.public.iastate.edu/~pdixon/R/>

- 810 ELIASSEN, S.; C. JØRGENSEN; M. MANGEL & J. GISKE (2007) Exploration or exploitation: life expectancy changes the value of learning in foraging strategies. *Oikos* 116:513–523
- ELIASSEN, S.; C. JØRGENSEN; M. MANGEL & J. GISKE (2009) Quantifying the adaptive value of learning in foraging behavior. *The American Naturalist* 174:478–489
- 815 ELITH, J.; C. H. GRAHAM; R. P. ANDERSON; M. DUDÍK; S. FERRIER; A. GUISAN; R. J. HIJMANS; F. HUETTMANN; J. R. LEATHWICK; A. LEHMANN; J. LI; L. G. LOHMANN; B. A. LOISELLE; G. MANION; C. MORITZ; M. NAKAMURA; Y. NAKAZAWA; J. M. OVERTON; A. TOWNSEND PETERSON; S. J. PHILLIPS; K. RICHARDSON; R. SCACHETTI-PEREIRA; R. E. SCHAPIRE; J. SOBERÓN; S. WILLIAMS; M. S. WISZ & N. E. ZIMMERMANN (2006) Novel methods improve prediction of species' distributions from occurrence data. *Ecography* 29:129–151
- 820 FAWCETT, T. W.; S. HAMBLIN & L. A. GIRALDEAU (2013) Exposing the behavioral gambit: the evolution of learning and decision rules. *Behavioral Ecology* 24:2–11
- FIERER, N. & B. P. KOTLER (2000) Evidence for micropatch partitioning and effects of boundaries on patch use in two species of gerbils. *Functional Ecology* 14:176–182
- 825 FOLGARAIT, P. J.; J. A. MONJEAU & M. KITTLEIN (1998) Solving the enigma of granivory rates in Patagonia and throughout other deserts of the world: is thermal range the explanation? *Ecología Austral* 8:251–263
- FORTIN, M.-J. & M. R. T. DALE (2005) *Spatial analysis: a guide for ecologist*. Cambridge University Press, New York
- 830 FORTIN, M.-J.; M. R. T. DALE & J. VER HOEF (2002) Spatial analysis in ecology. Pp. 2051–2058 en: A. H. El-Shaarawi & W. W. Piegorsch (eds) *Encyclopedia of Environmetrics. Volume 4*. John Wiley & Sons, Chichester
- GARCÍA, D.; J. R. OBESO & I. MARTÍNEZ (2005) Rodent seed predation promotes differential recruitment among bird-dispersed trees in temperate secondary forests. *Oecologia* 144:435–446
- GUO, Q.; P. W. RUNDEL & D. W. GOODALL (1998) Horizontal and vertical distribution of desert seed banks: patterns, causes, and implications. *Journal of Arid Environments* 38:465–478
- 835 GUO, Q.; D. B. THOMPSON; T. J. VALONE & J. H. BROWN (1995) The effects of vertebrate granivores and folivores on plant community structure in the Chihuahuan Desert. *Oikos* 73:251–259



- HIRZEL, A. H.; J. HAUSSER; D. CHESSEL & N. PERRIN (2002) Ecological-Niche Factor Analysis: How to compute habitat-suitability maps without absence data? *Ecology* 83:2027–2036
- HOWE, H. F. & J. S. BROWN (2001) The ghost of granivory past. *Ecology Letters* 4:371–378
- 840 HULME, P. E. (1994) Postdispersal seed predation in grassland: its magnitude and sources of variation. *Journal of Ecology* 82:645–652
- HULME, P. E. (1997) Post-dispersal seed predation and the establishment of vertebrate dispersed plants in Mediterranean scrublands. *Oecologia* 111:91–98
- JACKSON, D. A. (1993) Stopping rules in Principal Components Analysis: a comparison of heuristical and  
845 statistical approaches. *Ecology* 74:2204–2214
- JAMES, F. C. & C. E. MCCULLOCH (1990) Multivariate analysis in ecology and systematics: panacea or Pandora's box? *Annual Review of Ecology and Systematics* 21:129–166
- JONES, J. (2001) Habitat selection studies in avian ecology: a critical review. *The Auk* 118:557–562
- JONES, K. A.; J. R. KREBS & M. J. WHITTINGHAM (2006) Interaction between seed crypsis and habitat  
850 structure influence patch choice in a granivorous bird, the chaffinch *Fringilla coelebs*. *Journal of Avian Biology* 37:413–418
- KELRICK, M. I.; J. A. MACMAHON; R. R. PARMENTER & D. V. SISSON (1986) Native seed preferences of shrub-steppe rodents, birds and ants: the relationships of seed attributes and seed use. *Oecologia* 68: 327–333
- 855 KELT, D. A.; P. L. MESERVE & J. R. GUTIÉRREZ (2004) Seed removal by small mammals, birds and ants in semi-arid Chile, and comparison with other systems. *Journal of Biogeography* 31:931–942
- KERLEY, G. I. H. (1991) Seed removal by rodents, birds and ants in the semi-arid Karoo, South Africa. *Journal of Arid Environments* 20:63–69
- KLAASSEN, R. H. G.; B. A. NOLET & J. DE FOUW (2006a) Intake rate at differently scaled heterogeneous  
860 food distributions explained by the ability of tactile-foraging mallard to concentrate foraging effort within profitable areas. *Oikos* 112: 322–331

- KLAASSEN, R. H. G.; B. A. NOLET; J. A. VAN GILS & S. BAUER (2006b) Optimal movement between patches under incomplete information about the spatial distribution of food items. *Theoretical Population Biology* 70:452–463
- 865 KOHLMANN, S. G. & K. L. RISENHOOVER (1998) Effects of resource distribution, patch spacing, and preharvest information on foraging decisions of northern bobwhites. *Behavioral Ecology* 9:177–186
- KOTLIAR, N. B. & J. A. WIENS (1990) Multiple scales of patchiness and patch structure: a hierarchical framework for the study of heterogeneity. *Oikos* 59:253–260
- 870 LATIMER, A. M.; S. WU; A. E. GELFAND & J. A. SILANDER, JR. (2006) Building statistical models to analyze species distributions. *Ecological Applications* 16:33–50
- LIMA, S. L. (2002) Putting predators back into behavioral predator–prey interactions. *Trends in Ecology & Evolution* 17:70–75
- LIMA, S. L. & P. A. BEDNEKOFF (1999) Temporal variation in danger drives antipredator behavior: the predation risk allocation hypothesis. *The American Naturalist* 153:649–659
- 875 LIMA, S. L.; K. L. WIEBE & L. M. DILL (1987) Protective cover and the use of space by finches: is closer better? *Oikos* 50:225–230
- LOPEZ DE CASENAVE, J. (2001) *Estructura gremial y organización de un ensamble de aves del desierto del Monte*. Doctoral Thesis. Univ. de Buenos Aires, Buenos Aires
- 880 LOPEZ DE CASENAVE, J.; V. R. CUETO & L. MARONE (1998) Granivory in the Monte desert, Argentina: is it less intense than in other arid zones of the world? *Global Ecology and Biogeography Letters* 7:197–204
- LOPEZ DE CASENAVE, J.; V. R. CUETO & L. MARONE (2008) Seasonal dynamics of guild structure in a bird assemblage of the central Monte desert. *Basic and Applied Ecology* 9:78–90
- 885 LOPEZ DE CASENAVE, J.; L. MARONE; F. JAKSIC & P. CAMUS (2007) Escalas. Pp. 193–213 en: F. Jaksic & L. Marone (eds) *Ecología de Comunidades*. Segunda edición ampliada. Ediciones Universidad Católica de Chile, Santiago
- MACÍAS-DUARTE, A. & A. O. PANJABI (2013) Home range and habitat use of wintering Vesper Sparrows in grasslands of the Chihuahuan Desert in Mexico. *The Wilson Journal of Ornithology* 125:755–762

- MACMAHON, J. A.; J. F. MULL & T. O. CRIST (2000) Harvester ants (*Pogonomyrmex* spp.): their  
890 community and ecosystem influences. *Annual Review of Ecology and Systematics* 31:265–291
- MANSON, R. H. & E. W. STILES (1998) Links between microhabitat preferences and seed predation by  
small mammals in old fields. *Oikos* 82:37–50
- MARES, M. A. & M. L. ROSENZWEIG (1978) Granivory in North and South American deserts: rodents,  
birds, and ants. *Ecology* 59:235–241
- 895 MARON, J. L.; D. E. PEARSON; T. POTTER & Y. K. ORTEGA (2012) Seed size and provenance mediate the  
joint effects of disturbance and seed predation on community assembly. *Journal of Ecology* 100:1492–  
1500
- MARONE, L. (1992) Seasonal and year-to-year fluctuations of bird populations and guilds in the Monte  
desert, Argentina. *Journal of Field Ornithology* 63: 294–308
- 900 MARONE, L.; V. R. CUETO; F. A. MILESI & J. LOPEZ DE CASENAVE (2004) Soil seed bank composition  
over desert microhabitats: patterns and plausible mechanisms. *Canadian Journal of Botany* 82:1809–  
1816
- MARONE, L. & M. E. HORNO (1997) Seed abundance in the central Monte desert, Argentina: implications  
for granivory. *Journal of Arid Environments* 36: 661–670
- 905 MARONE, L.; M. E. HORNO & R. GONZÁLEZ DEL SOLAR (2000a) Post-dispersal fate of seeds in the Monte  
desert of Argentina: patterns of germination in successive wet and dry years. *Journal of Ecology*  
88:940–949
- MARONE, L.; J. LOPEZ DE CASENAVE & V. R. CUETO (1997) Patterns of habitat selection by wintering and  
breeding granivorous birds in the central Monte desert, Argentina. *Revista Chilena de Historia*  
910 *Natural* 70:73–81
- MARONE, L.; J. LOPEZ DE CASENAVE; F. A. MILESI & V. R. CUETO (2008) Can seed-eating birds exert  
top-down effects on grasses of the Monte desert? *Oikos* 117: 611–619
- MARONE, L.; J. LOPEZ DE CASENAVE & V. R. CUETO (2000b) Granivory in southern South American  
deserts: conceptual issues and current evidence. *BioScience* 50:123–132

- 915 MARONE, L.; B. E. ROSSI & M. E. HORNO (1998a) Timing and spatial patterning of seed dispersal and redistribution in a South American warm desert. *Plant Ecology* 137:143–150
- MARONE, L.; B. E. ROSSI & J. LOPEZ DE CASENAVE (1998b) Granivore impact on soil-seed reserves in the central Monte desert, Argentina. *Functional Ecology* 12:640–645
- MARSHALL, H. H.; A. J. CARTER; A. ASHFORD; J. M. ROWCLIFFE & G. COWLISHAW (2013) How do  
920 foragers decide when to leave a patch? A test of alternative models under natural and experimental conditions. *Journal of Animal Ecology* 82:894–902
- MARTIN, T. G.; B. A. WINTLE; J. R. RHODES; P. M. KUHNERT; S. A. FIELD; S. J. LOW-CHOY; A. J. TYRE & H. P. POSSINGHAM (2005) Zero tolerance ecology: improving ecological inference by modelling the source of zero observations. *Ecology Letters* 8:1235–1246
- 925 MAYOR, S. J.; D. C. SCHNEIDER; J. A. SCHAEFER & S. P. MAHONEY (2009) Habitat selection at multiple scales. *Ecoscience* 16:238–247
- MEYER, M. D. & T. J. VALONE (1999) Foraging under multiple costs: the importance of predation, energetic and assessment error costs to a desert forager. *Oikos* 87:571–579
- MEZQUIDA, E. T. (2003) La reproducción de cinco especies de Emberizidae y Fringillidae en la Reserva  
930 de Ñacuñán, Argentina. *Hornero* 18:13–20
- MEZQUIDA, E. T. (2004) Nest site selection and nesting success of five species of passerines in a South American open *Prosopis* woodland. *Journal of Ornithology* 145:16–22
- MILESI, F. A. (2006) *Selección de sitios de alimentación por aves granívoras en el desierto del Monte*. Doctoral Thesis. Univ. de Buenos Aires, Buenos Aires.
- 935 MILESI, F. A., J. LOPEZ DE CASENAVE & V. R. CUETO (2008) Selection of foraging sites by desert granivorous birds: vegetation structure, seed availability, species-specific foraging tactics, and spatial scale. *Auk* 125: 473–484
- MILESI, F. A. & L. MARONE (2015) Exploration and exploitation of foraging patches by desert sparrows: environmental indicators and local evaluation of spatially correlated costs and benefits. *Journal of*  
940 *Avian Biology* 46:225–235

- MITCHELL, W. A. (1989) Informational constraints on optimally foraging hummingbirds. *Oikos* 55:145–154
- MITCHELL, W. A. & S. L. LIMA (2002) Predator-prey shell games: large-scale movement and its implications for decision-making by prey. *Oikos* 99:249–259
- 945 MOKOTJOMELA, T. M.; C. F. MUSIL & K. J. ESLER (2014) An appraisal of seed enumeration and videographic techniques for determining seed removal rates by birds. *African Journal of Ecology* 54: 281–288
- MORRISON, M. L.; B. G. MARCOT & R. W. MANNAM (2006) *Wildlife–habitat relationships: concepts and applications*. 3rd edition. Island Press.
- 950 NELSON, J. F. & R. M. CHEW (1977) Factors affecting seed reserves in the soil of a Mojave Desert ecosystem, Rock Valley, Nye County, Nevada. *American Midland Naturalist* 97:300–320
- OLSSON, O. & J. S. BROWN (2006) The foraging benefits of information and the penalty of ignorance. *Oikos* 112: 260–273
- OLSSON, O. & J. S. BROWN (2010) Smart, smarter, smartest: foraging information states and coexistence. 955 *Oikos* 119: 292–303
- OLSSON, O. & M. N. MOLOKWU (2007) On the missed opportunity cost, GUD, and estimating environmental quality. *Israel Journal of Ecology & Evolution* 53:263–278
- ORROCK, J. L.; D. J. LEVEY; B. J. DANIELSON & E. I. DAMSCHEN (2006) Seed predation, not seed dispersal, explains the landscape-level abundance of an early-successional plant. *Journal of Ecology* 94:838–845 960
- PARMENTER, R.R.; J.A. MACMAHON & S. B. VANDERWALL (1984) The measurement of granivory by desert rodents, birds and ants: a comparison of an energetics approach and a seed-dish technique. *Journal of Arid Environments* 7:75–92
- PECO, B.; S. W. LAFFAN & A. T. MOLES (2014) Global patterns in post-dispersal seed removal by 965 invertebrates and vertebrates. *PLoS ONE* 9:e91256
- PERES-NETO, P. R. & D. A. JACKSON (2001) The importance of scaling of multivariate analyses in ecological studies. *Écoscience* 8:522–526

- PERRY, J. N. & P. M. DIXON (2002) A new method to measure spatial association for ecological count data. *Ecoscience* 9:133–141
- 970 PERRY, J. N.; A. M. LIEBHOLD; M. S. ROSENBERG; J. DUNGAN; M. MIRITI; A. JAKOMULSKA & S. CITRON-POUSTY (2002) Illustrations and guidelines for selecting statistical methods for quantifying spatial pattern in ecological data. *Ecography* 25:578–600
- POTVIN, C. & D. A. ROFF (1993) Distribution-free and robust statistical methods: viable alternatives to parametric statistics. *Ecology* 74:1617–1628
- 975 PRICE, M. V. & J. W. JOYNER (1997) What resources are available to desert granivores: seed rain or soil seed bank? *Ecology* 78:764–773
- PRICE, M. V. & O. J. REICHMAN (1987) Distribution of seeds in Sonoran Desert soils: implications for heteromyid rodent foraging. *Ecology* 68:1797–1811
- PULLIAM, H. R. (1985) Foraging efficiency, resource partitioning and the coexistence of sparrow species. *Ecology* 66:1829–1836
- 980 PULLIAM, H. R. & G. S. MILLS (1977) The use of space by wintering sparrows. *Ecology* 58:1393–1399
- PYKE, G. H. (1984) Optimal foraging theory: a critical review. *Annual Review of Ecology and Systematics* 15:523–575
- R CORE TEAM (2013) R: A language and environment for statistical computing. R Foundation for Statistical Computing. URL: <http://www.R-project.org/>
- 985 REICHMAN, O. J. (1979) Desert granivore foraging and its impact on seed densities and distributions. *Ecology* 60:1085–1092
- REPASKY, R. R. & D. SCHLUTER (1994) Habitat distributions of wintering sparrows along an elevational gradient: tests of the food, predation and microhabitat structure hypotheses. *Journal of Animal Ecology* 63:569–582
- 990 REYNOLDS, A. (2012) Fitness-maximizing foragers can use information about patch quality to decide how to search for and within patches: optimal Levy walk searching patterns from optimal foraging theory. *Journal of the Royal Society Interface* 9:1568–1575

- ROSENBERG, M. S. (2001) *PASSAGE. Pattern Analysis, Spatial Statistics, and Geographic Exegesis*.  
995       Version 1.1.2.3. Department of Biology, Arizona State University, Tempe
- ROTENBERRY, J. T. & J. A. WIENS (1998) Foraging patch selection by shrubsteppe sparrows. *Ecology*  
79:1160–1173
- RUSSELL, S. K. & E. W. SCHUPP (1998) Effects of microhabitat patchiness on patterns of seed dispersal  
and seed predation of *Cercocarpus ledifolius* (Rosaceae). *Oikos* 81:434–443
- 1000       SAGARIO, M. C. (2011) *Limitación poblacional de las aves granívoras en la porción central del*  
*desierto del Monte*. Doctoral Thesis. Univ. de Buenos Aires, Buenos Aires
- SAGARIO, M. C. & V. R. CUETO (2014a) Evaluación del comportamiento territorial de cuatro especies de  
aves granívoras en el Monte central. *Hornero* 29:81–92
- SAGARIO, M. C. & V. R. CUETO (2014b) Seasonal space use and territory size of resident sparrows in the  
1005       central Monte Desert, Argentina. *Ardeola* 61:153–159
- SAGARIO, M. C.; V. R. CUETO & J. LOPEZ DE CASENAVE (2014) Movement patterns of three species of  
sparrow in the central Monte desert, Argentina: differences between and within species. *Emu* 114:  
268–276
- SCHLUTER, D. (1988) The evolution of finch communities on islands and continents: Kenya vs.  
1010       Galapagos. *Ecological Monographs* 58:229–249
- SCHMIDT, K. A. & J. S. BROWN (1996) Patch assessment in fox squirrels: the role of resource density,  
patch size, and patch boundaries. *The American Naturalist* 147:360–380
- SCHMIDT, K. A.; S. R. DALL & J. A. VAN GILS (2010) The ecology of information: an overview on the  
ecological significance of making informed decisions. *Oikos* 119:304–316
- 1015       SCHNEIDER, K. J. (1984) Dominance, predation, and optimal foraging in white-throated sparrow flocks.  
*Ecology* 65:1820–1827
- SIH, A. (2011) Foraging theory. Pp. 65–90 in: S. M. Scheiner & M. R. Willig (eds) *The theory of Ecology*.  
The University of Chicago Press, Chicago

- 1020 STEPHENS, D. W. (2007) Models of information use. Pp. 31–58 in: D. W. Stephens; J. S. Brown & R. C. Ydenberg (eds) *Foraging: behavior and ecology*. The University of Chicago Press, Chicago
- STEPHENS, D. W. & J. R. KREBS (1986) *Foraging theory*. Princeton University Press, Princeton
- SUHONEN, J. (1993) Predation risk influences the use of foraging sites by tits. *Ecology* 74:1197–1203
- THOMPSON, D. B.; J. H. BROWN & W. D. SPENCER (1991) Indirect facilitation of granivorous birds by desert rodents: experimental evidence from foraging patterns. *Ecology* 72:852–863
- 1025 TYRE, A. J.; B. TENHUMBERG; S. A. FIELD; D. NIEJALKE; K. PARRIS & H. P. POSSINGHAM (2003) Improving precision and reducing bias in biological surveys: estimating false-negative error rates. *Ecological Applications* 13:1790–1801
- U.S. NAVY (n.d.) *Naval Oceanography portal: Astronomical applications*. Retrieved from <http://www.usno.navy.mil/USNO/astronomical-applications>
- 1030 VALONE, T. J. (1991) Bayesian and prescient assessment: foraging with pre-harvest information. *Animal Behaviour* 41:569–577
- VÁSQUEZ, R. A., B. GROSSI & I. N. MÁRQUEZ (2006) On the value of information: studying changes in patch assessment abilities through learning. *Oikos* 112:298–310
- 1035 VERDOLIN, J. L. (2006) Meta-analysis of foraging and predation risk trade-offs in terrestrial systems. *Behavioral Ecology and Sociobiology* 60:457–464
- WALTHER, B. A. & A. G. GOSLER (2001) The effects of food availability and distance to protective cover on the winter foraging behaviour of tits (Aves: Parus). *Oecologia* 129:312–320
- WATTS, B. D. (1996) Landscape configuration and diversity hotspots in wintering sparrows. *Oecologia* 108:512–517
- 1040 WATTS, B. D. (1991) Effects of predation risk on distribution within and between habitats in Savannah sparrows. *Ecology* 72:1515–1519
- WEISZ, M. M.; J. M. NASSAR & E. M. PÉREZ (2012) Experimentos de oferta de semillas para estimar granivoría y sus errores metodológicos. *Ecotrópicos* 25:75–85



- 1045 WHITTINGHAM, M. J. & H. M. MARKLAND (2002) The influence of substrate on the functional response of an avian granivore and its implications for farmland bird conservation. *Oecologia* 130:637–644
- WIENS, J. A. (1985) Vertebrate responses to environmental patchiness in arid and semiarid ecosystems. Pp. 169–193 in: S. T. A. Pickett & P. S. White (eds) *The ecology of natural disturbance and patch dynamics*. Academic Press Inc., Orlando
- WILLSON, M. F. (1971) Seed selection in some North American finches. *Condor* 73:415–429
- 1050 YDENBERG, R. C.; J. S. BROWN & D. W. STEPHENS (2007) Foraging: an overview. Pp. 1–28 in: D. W. Stephens; J. S. Brown & R. C. Ydenberg (eds) *Foraging: behavior and ecology*. The University of Chicago Press, Chicago
- 1055 ZARCO, A. (2016) *Influencia de la estructura de la vegetación y del alimento sobre el uso del espacio por las aves granívoras del desierto del Monte Central*. Doctoral Thesis. Univ. de Buenos Aires, Buenos Aires
- ZARCO A. & V. R. CUETO (2017) Winter flock structure in the central Monte desert, Argentina. *Ardea* 105:89–97
